# Supplementary material for: PPAR and GST polymorphisms may predict changes in intellectual functioning in medulloblastoma survivors
Source: Springer Nature journal article supplement (doi:10.1007/s11060-018-03083-x), 2019-01-03
Supplement: MOESM3 [file 16373270]

| **Supplementary Table 1.** Breiman-Cutler variable importance measures for polymorphisms that did not predict change in FSIQ over time | |
| --- | --- |
| **Polymorphism** | **Prediction VIMP** |
| PPAR-Gamma | |
| rs12485478 | -0.01419 |
| rs4135268 | -0.02164 |
| rs2067819 | -0.04592 |
| rs4135275 | -0.03035 |
| rs9833097 | -0.06205 |
| rs1875796 | -0.06559 |
| rs1151999 | -0.06698 |
| rs2959272 | -0.07184 |
| rs2938392 | -0.07256 |
| rs13306745 | 0 |
| rs13061415 | -0.04592 |
| rs12496005 | -0.03204 |
| rs9858822 | -0.22492 |
| rs17793951 | -0.16499 |
| rs709149 | -0.11403 |
| rs2959272 | -0.07184 |
| rs709154 |  |
| PPAR-Alpha | |
| rs3892755 | 0 |
| rs1800234 | 0 |
| rs4253763 | -0.09831 |
| rs4253765 | -0.20678 |
| rs1042311 | 0 |
| rs6007662 | -0.14713 |
| PPAR-Delta | |
| rs2076169 | -0.01716 |
| rs1053049 | -0.14803 |
| GST | |
| rs4986949 | 0 |
| rs8191439 | 0 |
| rs4891 | -0.01643 |
| rs1871042 | -0.01805 |
| rs1695 | -0.02849 |
| rs2239892 | -0.05235 |
| rs749174 | -0.02568 |
